# Supplementary material
Source: PubMed Central journal article supplement (PMC3209783)
Supplement: emboj2011308s1.pdf [file emboj2011308s1.pdf]

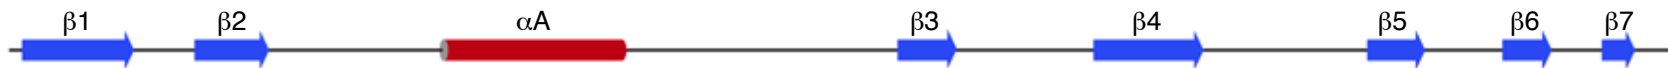

C

B

A

|             |             |      |                                                                                                                                      |
|-------------|-------------|------|--------------------------------------------------------------------------------------------------------------------------------------|
| Tudor.1     | FBpp0071508 | 11   | SKVDLYITHVDH-VGPKLVKYG-----HVNDAASLISERINRLPTCFIAEPSWSVERQOALLIPGTFICFKNINGPAPGDVEYRRIRVVSADLE-----GQSMRAEIDFVDFGKRTVD-SHDLMPFK      |
| Tudor.2     | FBpp0071508 | 410  | LTVDVVISYVEN-GPYLPFWHL-----KSSDHDLSLTMGGQIERTKLKALAQ-----APELGTACVARFSE-----DGHLRYRAMVCAVYA-----QRYRVVYVDYGNSELLS-ASDLFQIP           |
| Tudor.3     | FBpp0071508 | 595  | NDDAVEIRFIDS-PSNFYVQK-----VANIGKPEQLMDEMFSYNNANQRVDP-----QLILGAPCIVKC-----DQEWYRAEILRVDD-----SVIVRHVDYFYEQNVK-RHLIGHIA               |
| Tudor.4     | FBpp0071508 | 1016 | SKEAASLSWNL-SFFQYIIVP-----KVSASKYDNIMRDMREFYRQKQHQPL-----QLKVGSTVVVRQRK-----DNAILRATVTACNH-----MMRKYRVFCVDTGSLITVT-SEDIWGLE          |
| Tudor.5     | FBpp0071508 | 1214 | -----GQIRGKFTSIRD-----MTSFKVQF-DYGNVNVFL-----CTYDD                                                                                   |
| Tudor.6     | FBpp0071508 | 1309 | SSFQALVVYTAQ-PYRVVYVQ-----QAIVPSMQTLLDNMYEYKAKGDSLK-----KFDVGOICAVRSS-----DGNWYRARIISGKDS-----NAACFEVYFYIDYGNTEEIK-RDDIKALD          |
| Tudor.7     | FBpp0071508 | 1617 | DLDCVVLSECDN-PAQFYVHP-----IDQLSKLNQLHENLQIVSPSLPQLM-----NVVNGADCVSMYSV-----DKCWYRAKIIDAE-----LMVLLFDYDGNTEDCVS---DATDIK              |
| Tudor.8     | FBpp0071508 | 1795 | SGCSCYISHVNG-ICDFFIQL-----ERDSKALELIELYLKRDITLPLE-----GFEKGLIVAALFED-----DELWYRAQLQKELP-----DSRYEVLFDYDGNSTSTTS---KCLMLS             |
| Tudor.9     | FBpp0071508 | 1979 | VTKAIITHVEN-TSRIYLQF-----SEKDSLMDICEKLNKSKLQPKTE-----KAAVDDMCVVQPAD-----DLEFYRSRILEVLE-----DDQYKVLIDYDGNLTVVD-----KLYELP             |
| Tudor.10    | FBpp0071508 | 2163 | ENSECIIISYGN-SKSFYVQM-----KHSADLDELIVKTLQSLKKEKLKLI-----DPTNSNGMVCYSQE-----DACYYRCSIKSVLD-----PSQGFVFLDYDGNLTVVP-----EVMQLP          |
| Tudor.11    | FBpp0071508 | 2347 | ELHNCVVVQFDG-PMSFYVQM-----ESDPALEQMTDKLLDAEQDLPAFS-----DLKEGALCVAQFPE-----DEVFYRAQIRKVL-----DGKCEVHFDYDGNNAVTO---QFRQLP              |
| CG9925.1    | FBpp0082339 | 112  | FKCRVTFMENDG-PIWVVHVA-----NVEAIERMTVMNQRCMQNKMIKIRME-----GVREDTLVAISV-----GDKVHRGHVLTVCQ-----KKQEANVRMIDHGQIVATP-FRDIYITV            |
| CG9925.2    | FBpp0082339 | 271  | LNPEVKVIRVFK-ANP-----KHNEPQLALLQINVMGHVNDLNNRIAEKPRQPTLPPEQKSIFFAATRT-----KNGYRRAPLLDHIMK-----PRPTVLVYEMDEGRVSIAT---DLSRIP           |
| CG9925.3    | FBpp0082339 | 461  | HDSIVFISHLVS-FKEVYIST-----PDAKQYAEIFKRLEYKCATITKSS-----DVSVGSIVLVVSK-----QMGHFRGEILSKDS-----GLFEVMNVDTGATQYVA-LAEIRSSC               |
| CG9925.4    | FBpp0082339 | 722  | KVNLIIMNADGL-PQTGYITAAFY-----KDEKAAKEFEKILSLTSSQGACDHNVPVGY-----VPNVGELCLAIYSE-----DKNWYRGVCQEVKD-----NMVKILFDFGNTHEYA-VRHVKPIK      |
| CG9684.1    | FBpp0081342 | 136  | SGAMVYITDFIS-SNRKYIRD-----ASESAERAPDEVCKKVTIATLLPRIK-----NPPNRLCLVHF-----NGMYVRAKMCCKLR-----EVSHLFLVDLGIKHSGF-FPDFKIDN               |
| CG9684.2    | FBpp0081342 | 477  | EGIDLIVVDSTK-KNRGIFGAF-----DSTYASEFSALHSRLSEITDCEPY-----KPVVREYVLARF-----EGSVYRGKVEQIIVV-----PRQQTXYRVMLDYTNVEDIT-EMDIRRY            |
| CG4771.1    | FBpp0083716 | 322  | SGSKVRITAFEQ-TNVVYVRS-----DIQIDIAIYTVLDEVMLGKDKASKLQS-----TPVCGQIVLYKF-----EGHMSRAMVLNVDN-----IKEIYVVFIDYDGSVEVTO-LERLYECS           |
| CG4771.2    | FBpp0083716 | 524  | KNINVVMDNTFIQCGFIYCTS-----IDLAYEVTMKQRDIQYEGEKIACATY-----APPINELCIAKY-----EGKWRRLSVELVG-----DGYPISILFDYDGNIVPTH-VTDIRPYP             |
| CG14303.1   | FBpp0083074 | 277  | TDTLVRVRSVQS-PEDFYVQG-----IHAARQLREELDTFAHTLSDSSSVPP-----TIVVGQNYI IHKHD-----KDRYYRALVSQKLT-----NENLYNVFLTDIGVHLVHR-CSDFRVVP         |
| CG14303.2   | FBpp0083074 | 487  | DVYVMQMLHVED-PQEFYVMRH-----DYEKKRLWLFSLQEAADRINISQLQ-----NIFLQHLGCVLQS-----GGQWKRASIEQILP-----DGYVLVHLVDEGSPQKVF-WDQLFVLP            |
| CG14303.3   | FBpp0083074 | 722  | KRTTVNILYVRK-PDEFYVTL-----HFQKAINNLQKSVQKAAAAMQNLPRP-----DWQVGDMCYARVQANC-DSQALWYRGVVTVGVI-----PGITCPIVRYQVHLRDLGELIDDVHSSSLANID     |
| CG14303.4   | FBpp0083074 | 1026 | SVFTAIAATNVTY-ECCIIYTLA-----SDKPFIEHMGNLLVREYKPLMDKQKERSTSY-----TYKVGQAVVVVYTHM-----DNMIYRGIVQRLEN-----NHNEYTVYVYDYGNMELVK-ADEMLPYA  |
| CG14303.5   | FBpp0083074 | 1404 | KEYFYCTVDNVL-SDELQIAP-----CLSEPTKHEISLIQETSTLIKDAEPLM-----EPKVGDLCLARYSR-----DKQWYRANIKIISP-----ILSPTSEQVTVFYIDFHDTKQVS-FNLKLVMP     |
| Spindle-E.1 | FBpp0082637 | 892  | KTISGSITCIVN-CGKFFFPQPS-----FEECIRNMSEIFNAPOQLRNYVTNAS-----AIAKGMVLAKR-----DSYFORATVIRPEN-----QSNRQPMFYVRFIDYDGNCTLLP-MQLMRLMP       |
| Fs_1_Yb.1   | FBpp0070462 | 825  | GLIRFLVLVVCYS-PAALAVRLSDQFP-----TAIRFLNFPMSDLGERVQRHYLEANRHMH-----NPVPGEMAVVKN-----INRYERVHIVSVES-----NVMVLVQLLDTSTECFSYKTSQLYSCD    |
| CG11133.1   | FBpp0078210 | 520  | GDVKVQLVKVYS-PTHFCVRLLEHLP-----KGTWRMMEYSAVQEFRMQLTQIKEPRRYW-----PPVAGAIMCYHT-----TFTKERVRLKVAIKNTNIVQSDLTVKLQALDQVDTRI-FSTNCGKLFCEP |
| CG31755.1   | FBpp0079562 | 22   | QESILITHFVN-PHQFSYVR-----CIDVENSAMLVRQIEQDLKDYCSSERTKQ-----VYVEDERVIVRYQRWS-----PPKLVRGVRRRQ-----EYLVWILDYGFNLCCS-WDLWLP             |
| CG31755.2   | FBpp0079562 | 930  | TLIRCKFLKAYD-PAHMAVMPMKY-KSKDSTIWDVPPSYSTLVFVKMSFGVPRKVN-----PCKINDVCFVQH-----KELLSRVRIVDNPA-----RPQVTVOLMDYGTTELLQVKASOLLECP        |
| Tejas.1     | FBpp0086689 | 366  | QRIRVQLVSLVN-PHNFNFIY-----NDDFKDYEAQFANMQTFYESSKSNYTMPLF-----LITTDHLCVVR-----TSGWERAKVLGYRS-----SNNKMTIEVELVDIGDIRVS-QQNVKFLI        |
| CG8920.1    | FBpp0085592 | 558  | HDWNMFISFCDS-TKIVNARM-----IDQIANFEELTKHIGRQMESPHFRQKVS-----KPYAQEVYLVEM-----PDGWNVRVAISVDE-----ETRSGRYHFDYDGDVAMFH-SEDLFHC           |
| CG8920.2    | FBpp0085592 | 769  | KTTPILVSHIND-DGDLMLL-----RNDDLKPFVERIAQTVADLGEQDRVSY-----DLLHDRHIFVCDTVDGV-----KQWFRGLVTRPLN-----PDEESFDVYVDDGGRQKKAH-ISNIYRLE       |
| CG8920.3    | FBpp0085592 | 1034 | AYFEVRVALSVN-PGHFAVQ-----PYKYYNQLQTLMKNLQEHCRQTAAGVQPS-----QLAIGEAYAAPDS-----EGVYHRVSIHKIYD-----EIHVRFVVDVGGDGVIA-CDQLKTLN           |
| Krimper.1   | FBpp0086333 | 318  | TIVTAVLASVDV-TDNCAYVAK-----WDESSDRIKKVLRQLPLQELDQ-----LPDYGIDFAVLDSI-----NNIITRITINSSSA-----GGGYDAYLDFGEHIFHDGNETIFKLP               |
| Krimper.2   | FBpp0086333 | 570  | SIVGILITPING-PTEVYGFQFLD-----GSPPLVNDKDKDVPENKRTFKS-----KPRLLDIVLALYS-----DGCYFRAQIIDEFP-----SEYMFYVYDYGNTFEP-LSLAPCE                |
| Papi.1      | FBpp0077508 | 259  | KPMEVYVSAVAS-PTKFWVQLI-----GQSQKLLDSMVQEMTSYSSAENRAKHVLT-----APYVGOIVAAVFKF-----DEKWYRAEIVDIMPNOYN-----PKEQVIDLYFVDYGDSEYIS-PADICELR |
| Yu.1        | FBpp0070761 | 417  | INNDVVVSAVLS-GSHIFIQHPL-----HPSHPSLPLQLQKLYDSYSTMEAPLLP-----SLELSAVCVIPI-----NDVWYRVQIVDTPD-----EDEERCVIKFLDFGGYMNVG-FNTLRQIR        |
| Tudor-SN.1  | FBpp0072419 | 701  | NYENVIVTEITE-TLTFFAQSV-----ESGSKLESLSMCKLHADFQSNPPIAGSY-----TPKRGDVLAQFTL-----DNQWYRAKVERVQG-----SNAVTLYIDYGNKETLE-TNRLAALP          |
| CG15042.1   | FBpp0074390 | 74   | IGTKLTGTVLE-SLPVYVYTINGPGS-----KLLKCLAMGQVQLQEQLEQ-----LPDYEIYAFYDKA-----ENRISRIAINAPVH-----PMGYCAYMIDAAKYTNMGMERIFALP               |
| CG15042.2   | FBpp0074390 | 266  | SIVRVHVTIRVS-HAEFYARFADGPT-----VPTWSKSVMKRGTG-----DFRVWDIVLAPY-----QGRYHRAKIVDIFR-----CRYRVYFLDFGIGTEYTS-KKNLTFCY                    |
| CG15930.1   | FBpp0291095 | 285  | SIFPIIMSCVFS-PCFNFHIVPPQY-----AKNPVAEMTIDLNWFYRHTTISYRAELP-SYFYKEGYICAAYS-----ECGWRRAMVLVTAP-----LDAQCVNIEYVDHALSVTLA-PNHLRFLP       |
| CG13472.1   | FBpp0075441 | 729  | -----AMWQKGDLCMAKYWD-----DGRYEAETGVS-----KTCVVFFMGGYGNHEEVL-KVDILPIT                                                                 |
| Smn.1       | FBpp0075153 | 67   | -----PVSFKVGDYARATYV-----DGVDYEGAVVSINE-----EGKTCVLRILYLYGNEQEVL-LVDLLPSW                                                            |
| CG17454.1   | FBpp0289146 | 89   | -----AKIWKKGDKCQAKWKE-----DRQYDQATIEDISS-----TGEVNIYFDAYQNRSTTH-VNELRERT                                                             |
| CG3251.1    | FBpp0077113 | 300  | -----DYNFKVQAKCQVQLDTNR-----RDLLSACYIQSIDK-----KKSVCVKVIEQGLVDVP-SDNLHPLP                                                            |
| otu.1       | FBpp0071181 | 334  | -----DYNFKVQAKCKVELPN-----ETEMYTCHVQNIISK-----DKNYCHVVFVERIGKEIVVP-YESLHPLP                                                          |

1.....10.....20.....30.....40.....50.....60.....70.....80.....90.....100.....110.....120.....130.....

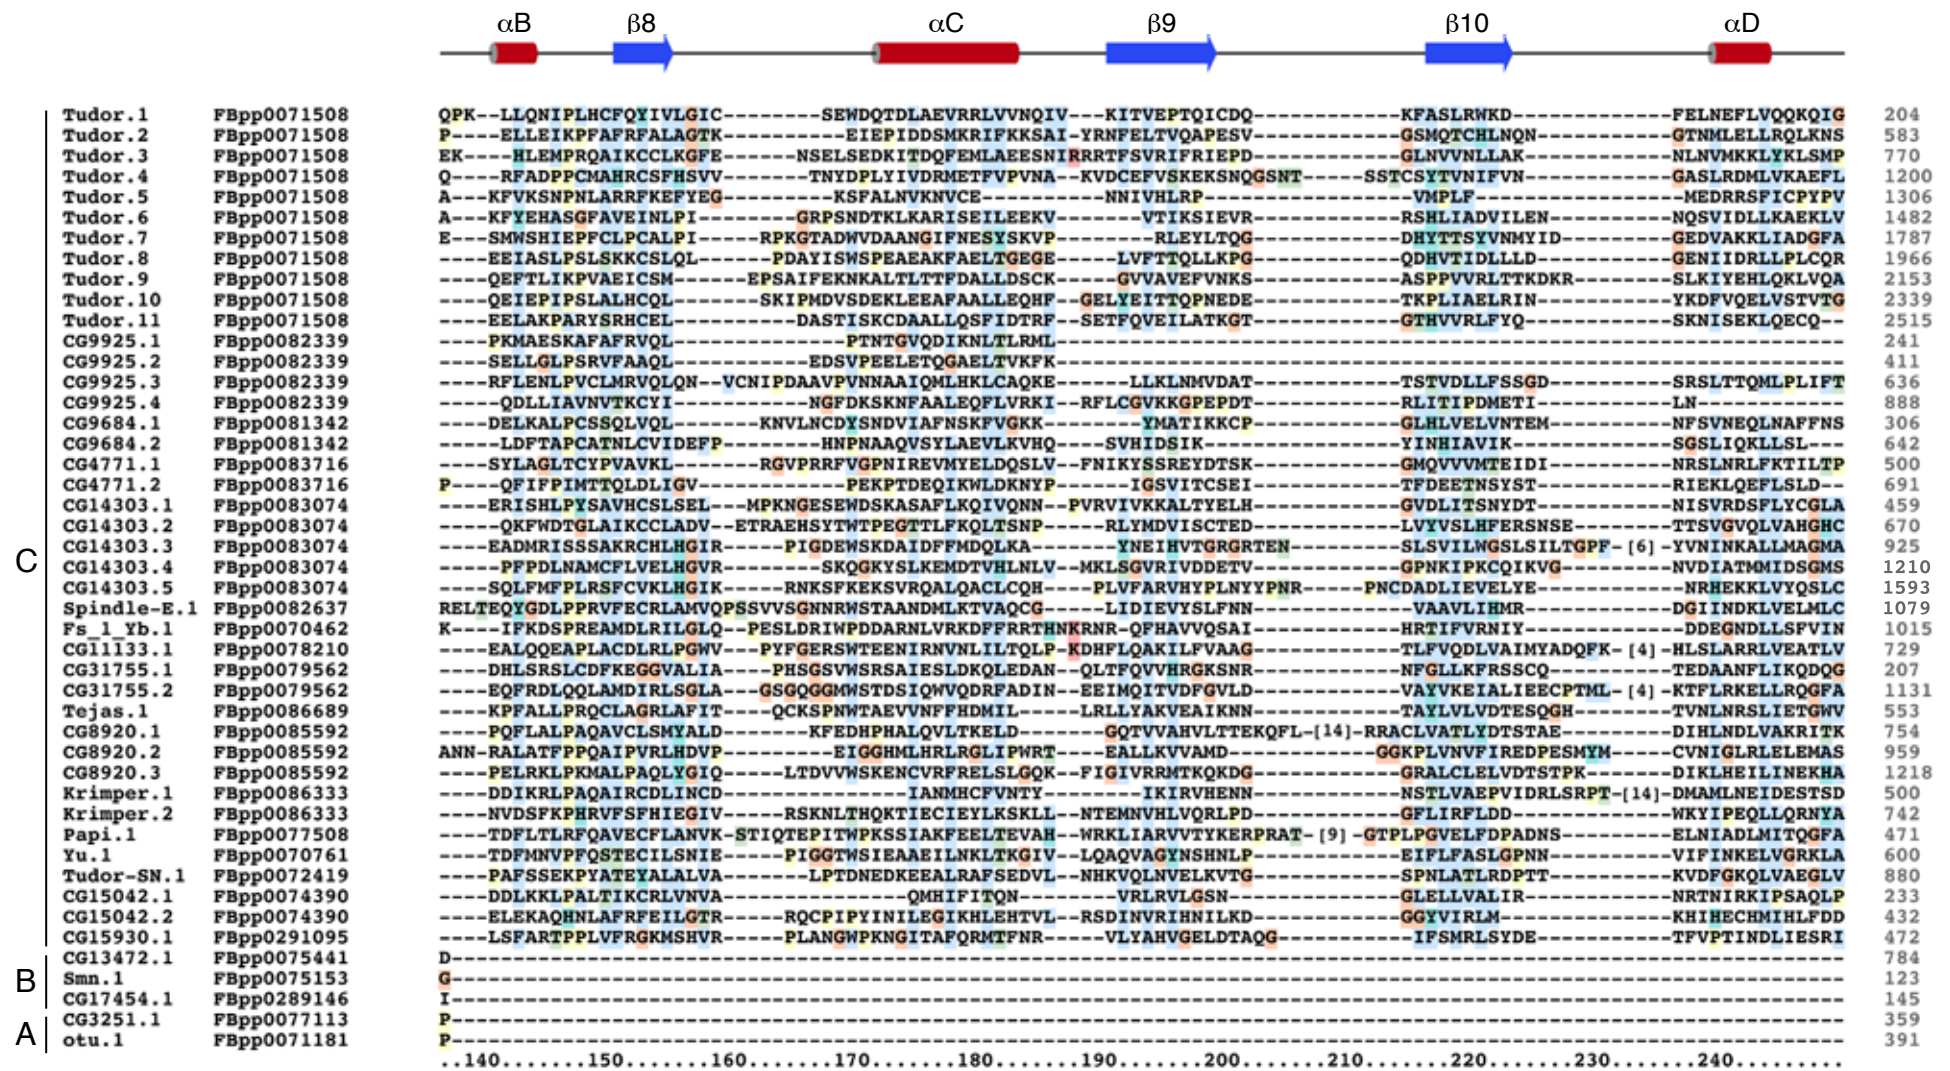

**Figure S1. Alignment of all *Drosophila melanogaster* TUDOR and SMN domains including N- and C-terminal extensions**

At the top, the secondary structure elements (blue:  $\beta$ -sheets; red:  $\alpha$ -helices) as defined by Liu et al. (2011a) are depicted with  $\beta$ -strands in blue and  $\alpha$ -helices in red. The alignment covers the entire extended TUDOR domain, including the N- and C-terminal extensions. Start and stop positions of each domain in the respective host protein are indicated at the beginning and at the end of the alignment as well as the corresponding FlyBase Protein ID. Residues were color coded using JalView (color option: ClustalX). To the left, the three groups (A: Otu group; B: Smn group; C: Tudor-extended group) are indicated.

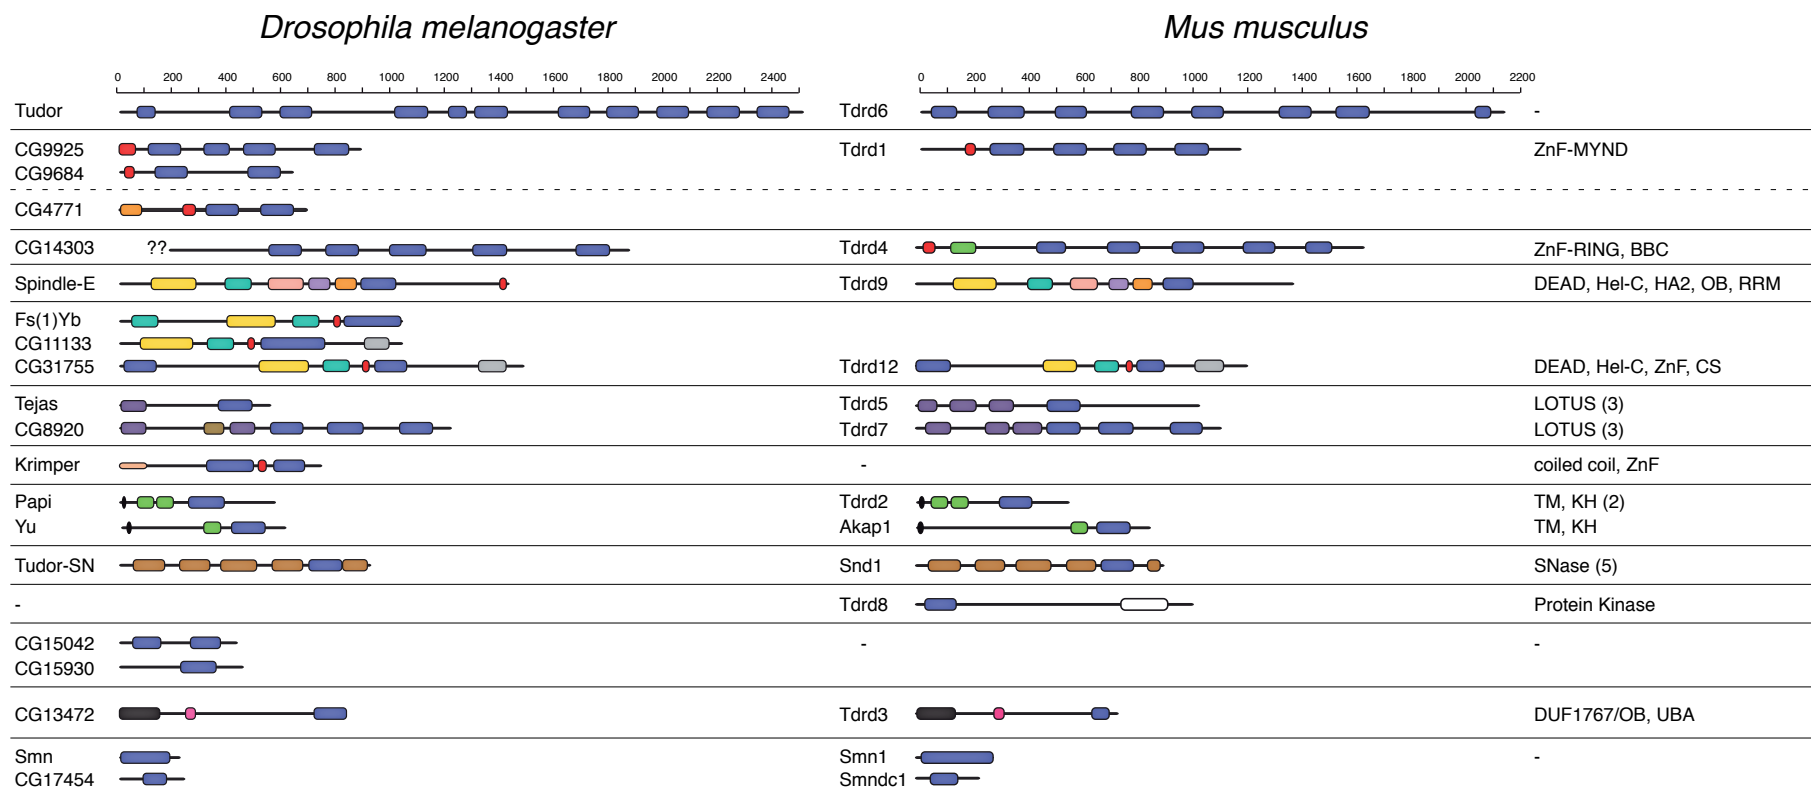

### Figure S2. The Fly and Mouse TUDOR domain containing proteins

Cartoon depicting all *Drosophila melanogaster* proteins containing TUDOR/SMN domains (blue boxes) and their corresponding mouse counterparts. All other significant protein domains identified via HHPRED searches are indicated with colored boxes and their identity (mouse proteins only) is given to the right from N to C-terminus (ZnF: zinc finger; BBC: B-Box C-terminal domain; OB: Oligo-Nucleotide binding domain; RRM: RNA recognition motif; DEAD: DEAD Box RNA Helicase domain; Hel-C: Helicase C-term. domain; HA2: Helicase associated domain; Hydrol.: Hydrolase; CS: HSP20-like domain; TM: transmembrane domain; KH: K homology; SNase: Staphylococcus nuclease; DUF: domain of unknown function; UBA: ubiquitin associated domain). For CG14303, the "??" indicate the non-mapped N-terminus. The scale indicates amino acid positions. Based on the additional contained domains, the proteins were grouped into families, separated by horizontal lines.

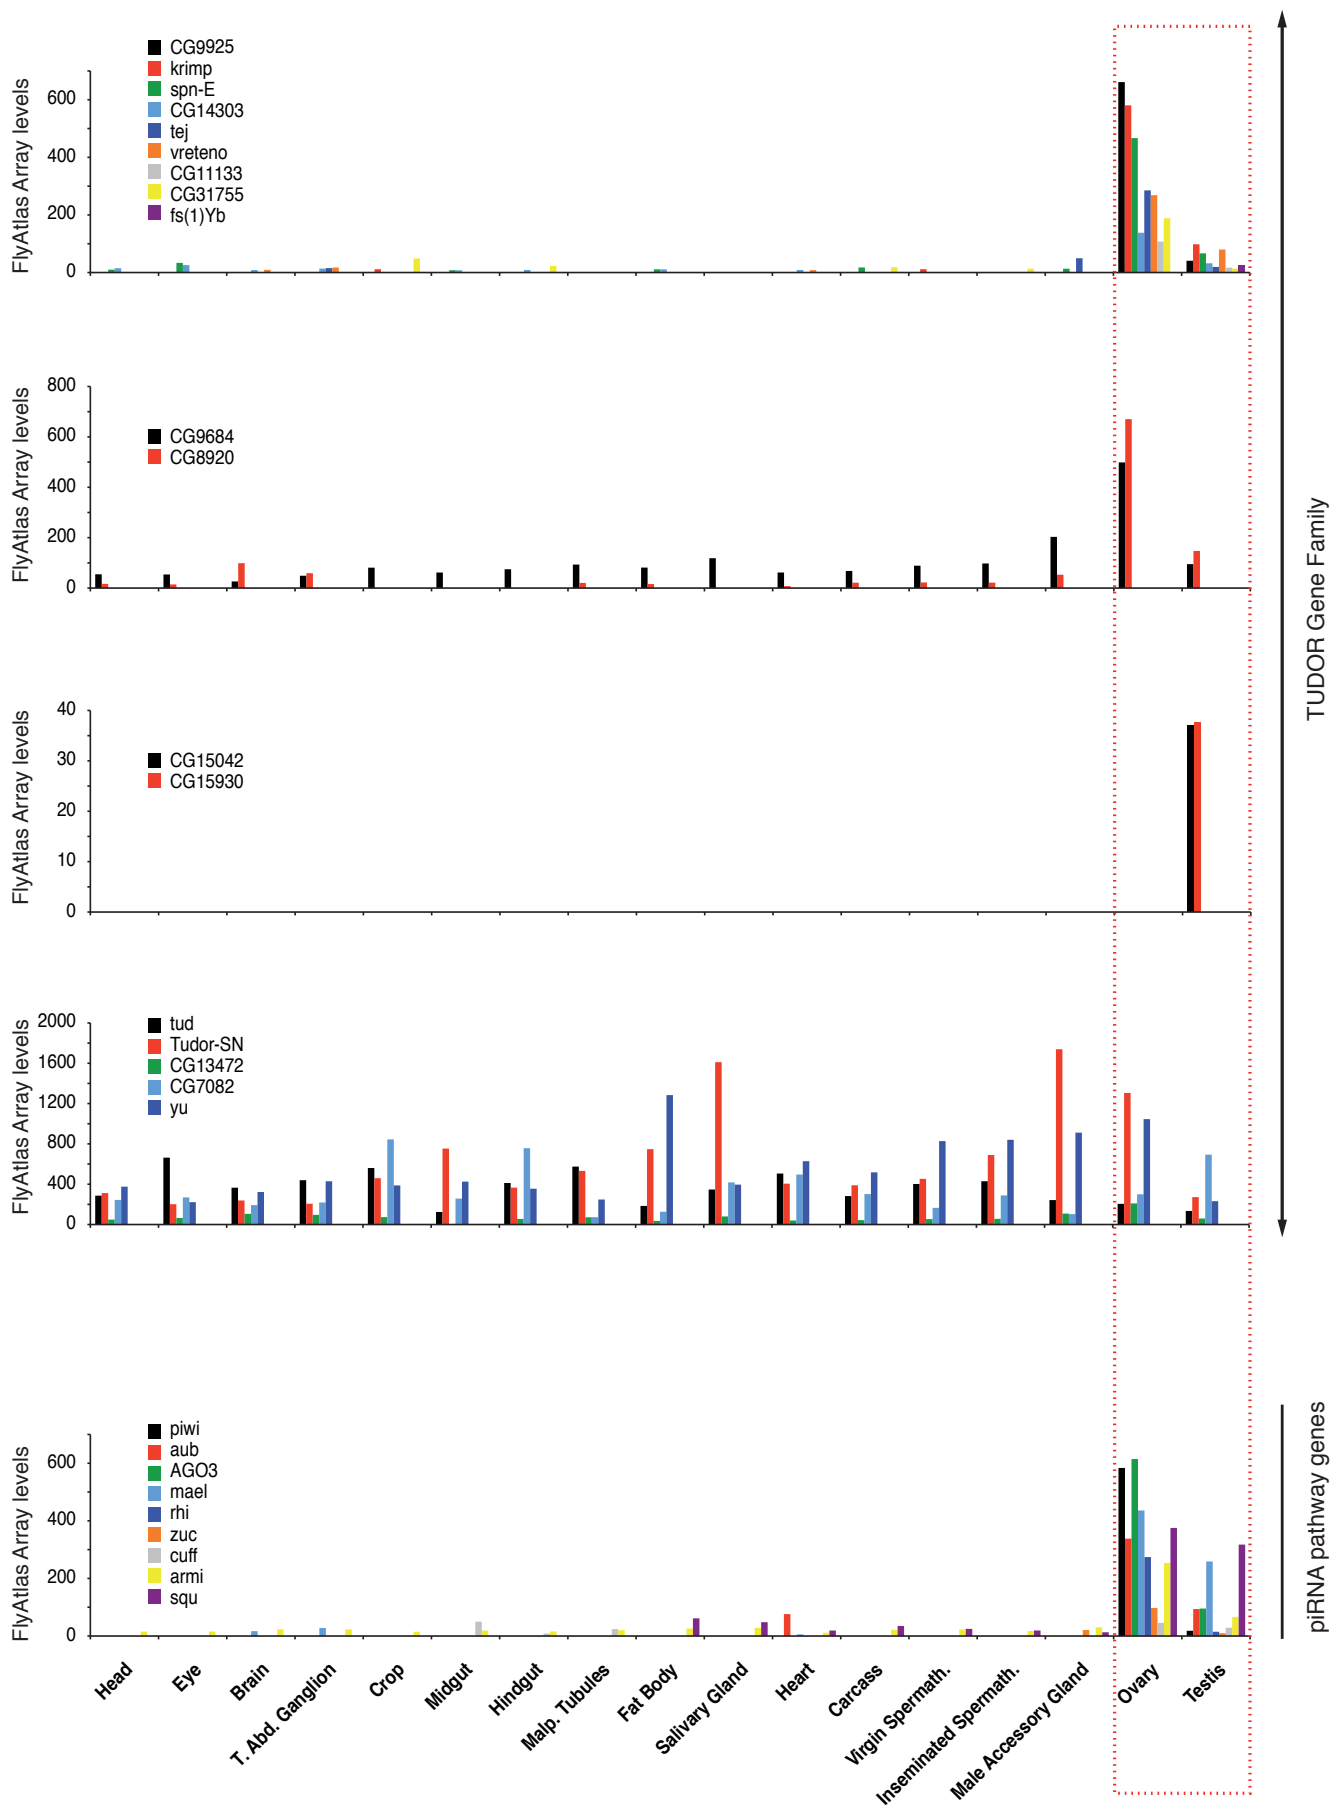

**Figure S3. Adult Expression Patterns of TUDOR and piRNA pathway genes in *Drosophila***

Bar Diagrams depicting the detected expression levels of the indicated genes (color coded; legend given for each diagram) in the indicated tissues (bottom). All values are based on data from the adult FlyAtlas ([www.flyatlas.org](http://www.flyatlas.org)). TUDOR genes were split into gonad specific (first), gonad enriched (second), testes specific (third) and ubiquitous (fourth).

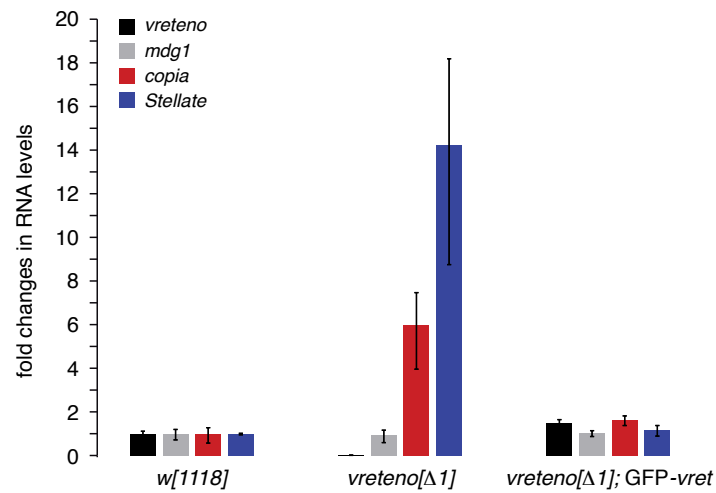

**Figure S4. *vreteno* is required for efficient transposon and *Stellate* silencing in testes**

Shown are changes in testes steady state RNA levels (normalized to *w[1118]* controls) of *vreteno*, the transposons *mdg1* and *copia* as well as of *Stellate* in *vreteno[Δ1]* flies compared to *vreteno[Δ1]* flies expressing a GFP-*vreteno* rescue construct (n=3; error bars indicate St. dev).

### Tabor piRNA profile

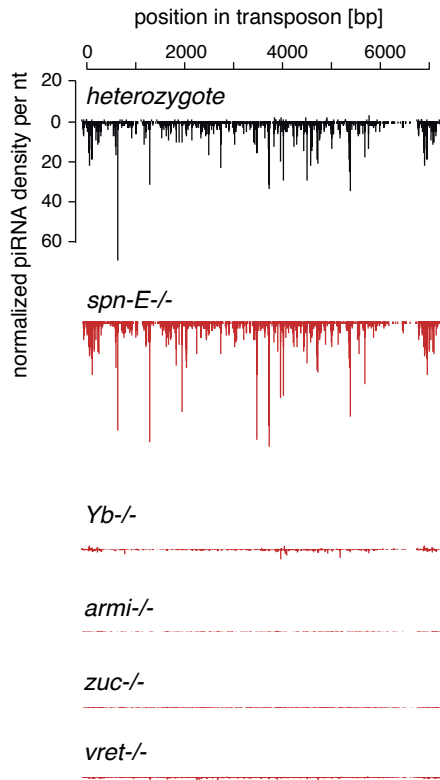

### ZAM piRNA profile

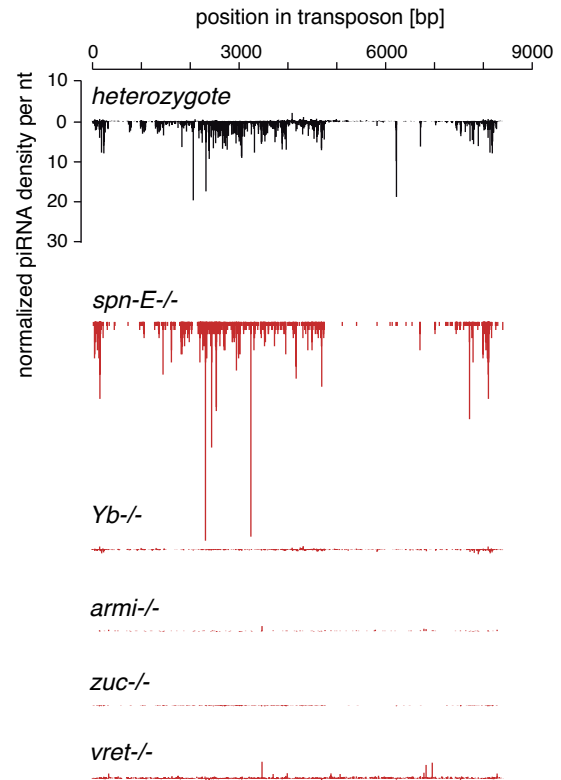

### Figure S5. piRNA populations of somatic transposons collapse in *vreteno* mutants

Shown are normalized piRNA profiles obtained from heterozygote ovaries (black) in comparison to profiles obtained from indicated mutant ovaries (red) mapping to the soma dominant transposons *Tabor* and *ZAM* (sense and antisense piRNAs are indicated with peaks pointing up- and downwards).

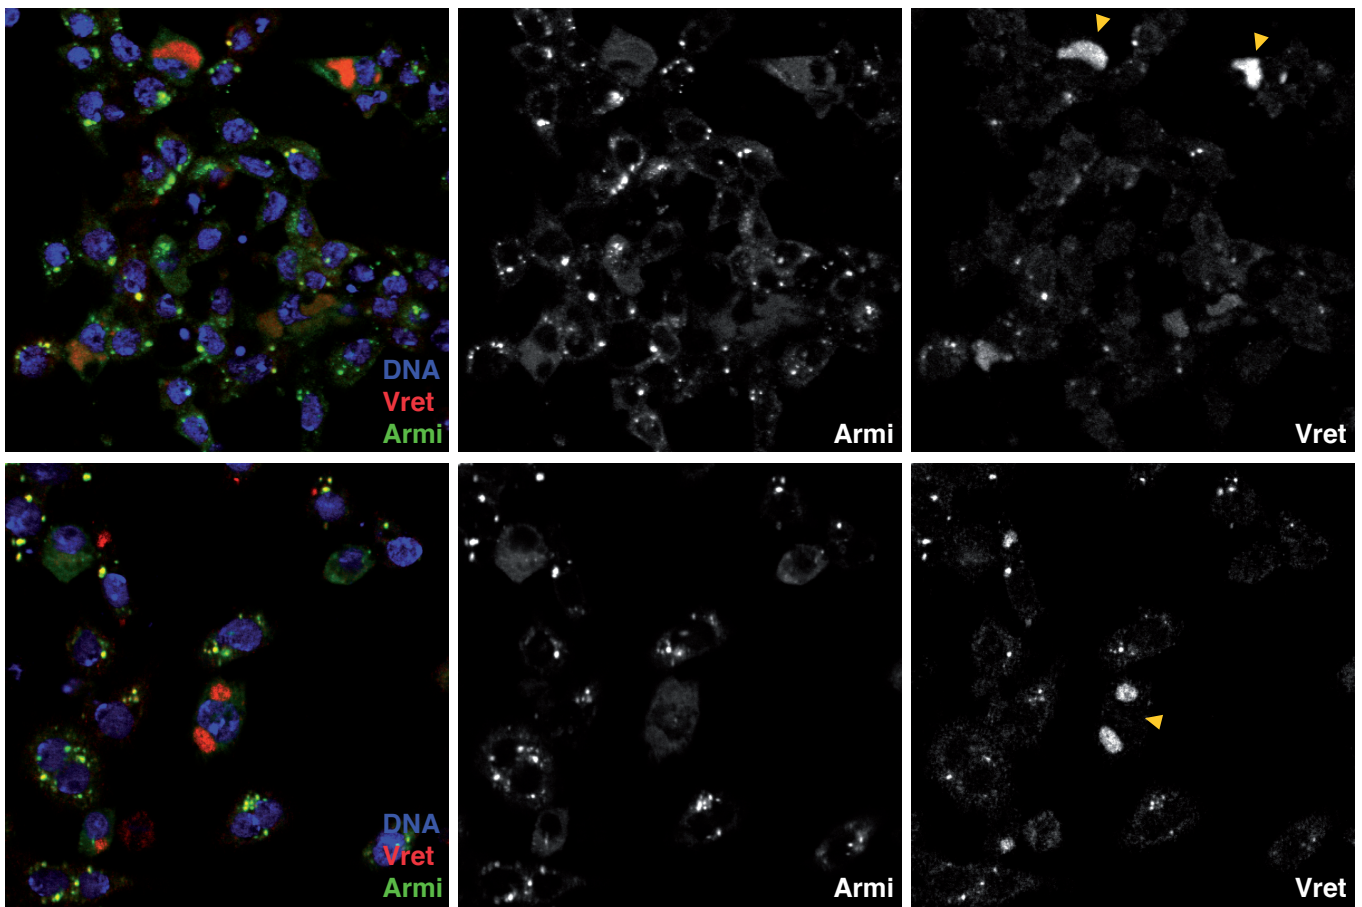

**Figure S6. Vreteno localizes to Armi-foci in cultured somatic follicle stem cells**

Shown are immunofluorescence images of fixed OSCs stained for Vreteno (red), Armitage (green) and DNA (blue). Two representative images are shown. Yellow arrowheads in the monochromatic Vreteno channel highlight the cells in which Yb-bodies have apparently dispersed, resulting in loss of Armitage foci and large cytoplasmic accumulations of Vreteno.

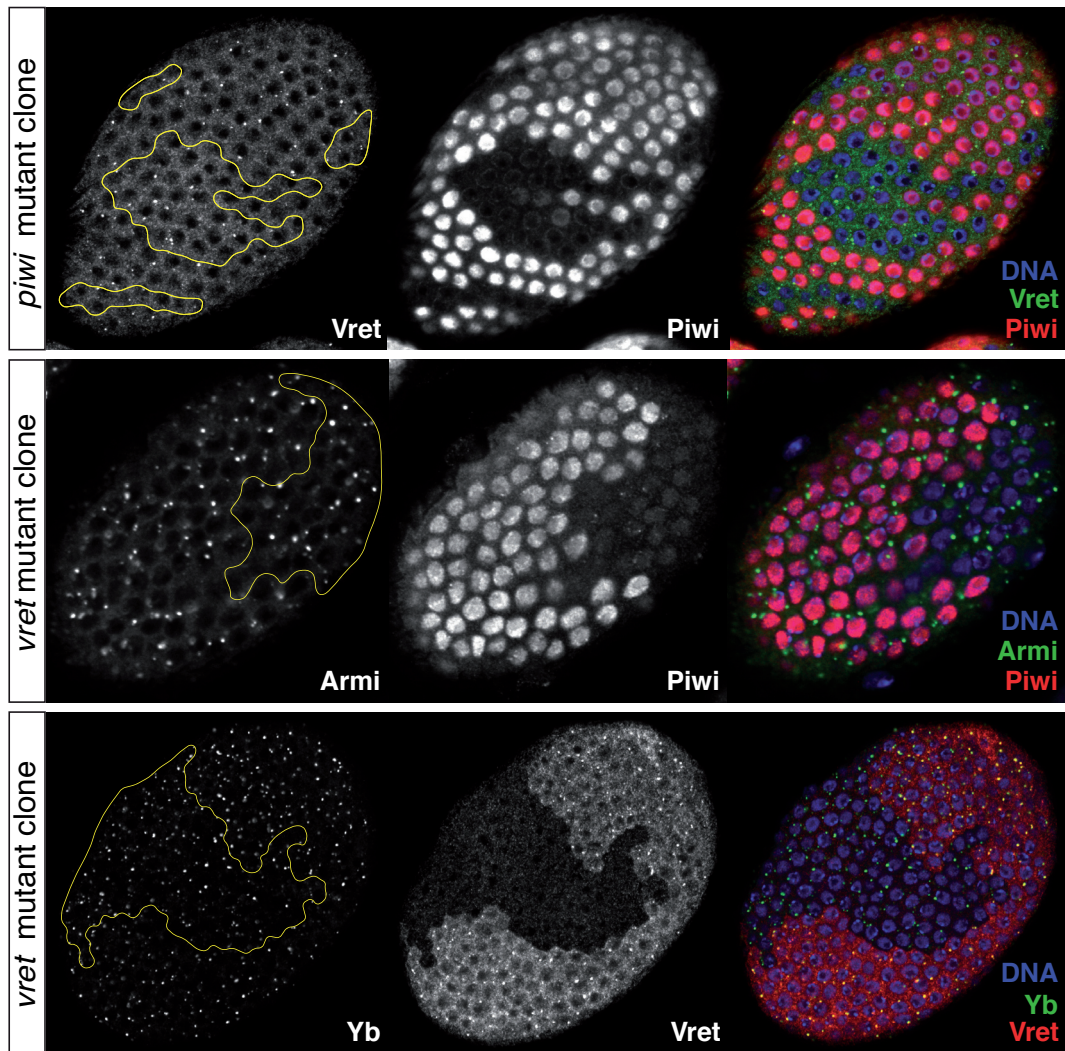

**Figure S7. Vreteno localization is independent of Piwi and its levels do not affect Yb-body formation.**

Immunostainings of Vret, Armi, Yb, Piwi and DNA (blue) in egg chambers, where clones of cells mutant for the indicated genes (left) have been induced in the follicular epithelium (clone borders indicated by a yellow line). The right panels show the merge of all three channels, the monochrome panels the individual channels as indicated.



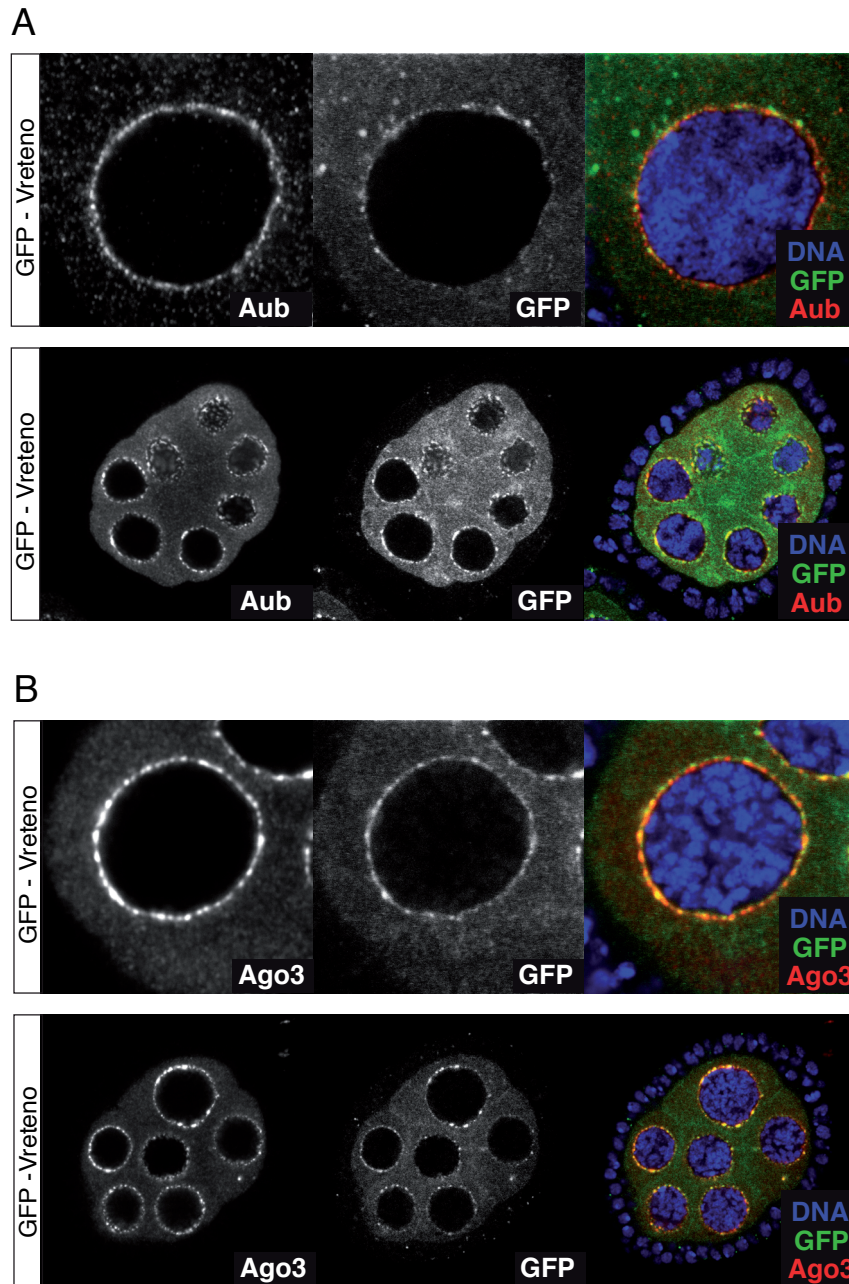

**Figure S8. Vreteno localizes to nuage in nurse cells in close proximity to Aubergine and Ago3.**

(A) Immunostainings of GFP-Vret (green), Aubergine (red) and DNA (blue) in an entire egg chamber (lower panel) or focused on an individual nurse cell nucleus (upper panels). The right panels show the merge of all three channels where co-localization results in yellow. (B) Immunostainings of GFP-Vret (green), Ago3(red) and DNA (blue) in an entire egg chamber (lower panel) or focused on an individual nurse cell nucleus (upper panels). The right panels show the merge of all three channels where co-localization results in yellow.

**Supplementary Table 1**

| <b>gene</b> | <b>label</b> | <b>name</b>                                  | <b>tudor clan domains</b>           |
|-------------|--------------|----------------------------------------------|-------------------------------------|
| FBgn0003044 | Pcl          | Polycomblike                                 | 53-BP1_Tudor                        |
| FBgn0250818 | CG34360      |                                              | 53-BP1_Tudor                        |
| FBgn0038780 | CG5060       |                                              | 53-BP1_Tudor                        |
| FBgn0051151 | wge          | winged eye                                   | 53-BP1_Tudor                        |
| FBgn0023509 | mip130       | Myb-interacting protein 130                  | 53-BP1_Tudor                        |
| FBgn0050390 | CG30390      |                                              | 53-BP1_Tudor,DUF1325                |
| FBgn0032169 | CG4709       |                                              | 53-BP1_Tudor,SMN                    |
| FBgn0028734 | Fmr1         | Fmr1                                         | Agenet,53-BP1_Tudor                 |
| FBgn0034255 | CG18186      |                                              | Chromo                              |
| FBgn0030854 | CG8289       |                                              | Chromo                              |
| FBgn0044324 | Chro         | Chromator                                    | Chromo                              |
| FBgn0023395 | Chd3         | Chd3                                         | Chromo                              |
| FBgn0013591 | Mi-2         | Mi-2                                         | Chromo                              |
| FBgn0086902 | kis          | kismet                                       | Chromo                              |
| FBgn0250786 | Chd1         | Chromodomain-helicase-DNA-binding protein 1  | Chromo                              |
| FBgn0003042 | Pc           | Polycomb                                     | Chromo                              |
| FBgn0003600 | Su(var)3-9   | Suppressor of variegation 3-9                | Chromo                              |
| FBgn0028965 | A16          | A16                                          | Chromo                              |
| FBgn0027914 | Gen          | XPG-like endonuclease                        | Chromo                              |
| FBgn0031613 | HP6          | Heterochromatin protein 6                    | Chromo_shadow                       |
| FBgn0259922 | CG42448      |                                              | Chromo_shadow                       |
| FBgn0030994 | CG14193      |                                              | Chromo_shadow                       |
| FBgn0003607 | Su(var)205   | Suppressor of variegation 205                | Chromo_shadow,Chromo                |
| FBgn0030082 | HP1b         | HP1b                                         | Chromo_shadow,Chromo                |
| FBgn0037675 | HP1e         | HP1e                                         | Chromo_shadow,Chromo                |
| FBgn0039019 | HP1c         | HP1c                                         | Chromo_shadow,Chromo                |
| FBgn0004400 | rhi          | rhino                                        | Chromo_shadow,Chromo                |
| FBgn0032475 | Sfmbt        | Scm-related gene containing four mbt domains | MBT                                 |
| FBgn0003334 | Scm          | Sex comb on midleg                           | MBT                                 |
| FBgn0038016 | MBD-R2       | MBD-R2                                       | MBT,53-BP1_Tudor                    |
| FBgn0086908 | egg          | eggless                                      | MBT,53-BP1_Tudor                    |
| FBgn0002441 | l(3)mbt      | lethal (3) malignant brain tumor             | MBT,Tudor-knot                      |
| FBgn0039743 | CG7946       |                                              | PWWP                                |
| FBgn0033155 | CG1845       |                                              | PWWP                                |
| FBgn0043456 | CG4747       |                                              | PWWP                                |
| FBgn0031023 | CG14200      |                                              | PWWP                                |
| FBgn0038190 | CG9926       |                                              | PWWP                                |
| FBgn0039559 | Mes-4        | Mes-4                                        | PWWP                                |
| FBgn0016754 | sba          | six-banded                                   | PWWP                                |
| FBgn0033752 | CG8569       |                                              | PWWP                                |
| FBgn0039863 | CG1815       |                                              | PWWP                                |
| FBgn0036882 | CG9279       |                                              | PWWP                                |
| FBgn0020503 | CLIP-190     | Cytoplasmic linker protein 190               | PWWP                                |
| FBgn0085451 | CG34422      |                                              | PWWP,53-BP1_Tudor,Tudor-knot,Chromo |
| FBgn0011785 | BRWD3        | BRWD3                                        | SMN                                 |
| FBgn0036467 | CG12310      |                                              | SMN                                 |
| FBgn0051268 | CG31268      |                                              | SMN                                 |
| FBgn0259241 | CG42339      |                                              | SMN                                 |
| FBgn0038191 | CG9925       |                                              | TUDOR                               |
| FBgn0037583 | CG9684       |                                              | TUDOR                               |
| FBgn0039018 | CG4771       |                                              | TUDOR                               |
| FBgn0033921 | CG8589       |                                              | TUDOR                               |
| FBgn0031401 | CG7082       |                                              | TUDOR                               |
| FBgn0029764 | yu           | yu                                           | TUDOR                               |
| FBgn0035121 | Tudor-SN     | Tudor-SN                                     | TUDOR                               |
| FBgn0003483 | spn-E        | spindle E                                    | TUDOR                               |
| FBgn0029754 | CG15930      |                                              | TUDOR                               |
| FBgn0034098 | krimp        | krimper                                      | TUDOR                               |
| FBgn0030937 | CG15042      |                                              | TUDOR                               |
| FBgn0037205 | CG11133      |                                              | TUDOR                               |
| FBgn0051755 | CG31755      |                                              | TUDOR                               |
| FBgn0000928 | fs(1)Yb      | female sterile (1) Yb                        | TUDOR                               |
| FBgn0003891 | tud          | tudor                                        | TUDOR                               |
| FBgn0038633 | CG14303      |                                              | TUDOR                               |
| FBgn0027529 | CG8920       |                                              | TUDOR                               |

|             |         |                           |            |
|-------------|---------|---------------------------|------------|
| FBgn0003023 | otu     | ovarian tumor             | TUDOR      |
| FBgn0031622 | CG3251  |                           | TUDOR      |
| FBgn0036450 | CG13472 |                           | TUDOR,SMN  |
| FBgn0039977 | CG17454 |                           | TUDOR,SMN  |
| FBgn0036641 | Smn     | survival motor neuron     | TUDOR,SMN  |
| FBgn0034975 | enok    | enoki mushroom            | Tudor-knot |
| FBgn0026080 | Tip60   | Tip60                     | Tudor-knot |
| FBgn0014340 | mof     | males absent on the first | Tudor-knot |
| FBgn0027378 | MRG15   | MRG15                     | Tudor-knot |
| FBgn0002775 | msl-3   | male-specific lethal 3    | Tudor-knot |
| FBgn0039585 | CG1894  |                           | Tudor-knot |

**Supplementary Table 2A**

this table lists the raw counts of 23-30mer small RNAs that map with up to 3 mismatches to the indicated transposons (from Repbase) in antisense orientation.

| #TP          | ZucMut | ZucHet | ArmiMut | ArmiHet | Fs1YbMut | Fs1YbHet | VretMut | VretHet |
|--------------|--------|--------|---------|---------|----------|----------|---------|---------|
| GYPSY6A_LTR  | 97     | 2521   | 42      | 1855    | 947      | 2143     | 802     | 4476    |
| DM412B_LTR   | 1378   | 32722  | 1527    | 48441   | 6182     | 19121    | 2035    | 58834   |
| STALKER3_LTR | 34     | 1880   | 12      | 1727    | 518      | 1024     | 139     | 4206    |
| GYPSY12A_LTR | 17     | 438    | 6       | 449     | 346      | 515      | 27      | 510     |
| DMTOM1_LTR   | 3      | 56     | 1       | 63      | 31       | 41       | 14      | 77      |
| BATUMI       | 43581  | 108401 | 21970   | 108450  | 105682   | 161040   | 59856   | 128518  |
| DMSAT6       | 1      | 12     | 3       | 11      | 13       | 11       | 1       | 10      |
| ACCORD       | 799    | 28448  | 840     | 40484   | 27183    | 34841    | 3159    | 62863   |
| TLD3         | 19     | 230    | 14      | 122     | 74       | 95       | 34      | 209     |
| GTWIN        | 1587   | 75721  | 136     | 92222   | 4748     | 19474    | 4657    | 168692  |
| PEN2         | 0      | 0      | 0       | 0       | 1        | 0        | 0       | 0       |
| INVADER3     | 3574   | 35224  | 8770    | 23828   | 43761    | 51587    | 1303    | 13088   |
| HETRP        | 4144   | 29908  | 3852    | 16439   | 15304    | 73977    | 4033    | 11782   |
| TART         | 2566   | 116067 | 2608    | 91599   | 112408   | 142211   | 8669    | 95882   |
| LTRMDG3      | 445    | 5033   | 711     | 2440    | 3436     | 7542     | 333     | 2154    |
| PROTOP_A     | 23501  | 22911  | 10835   | 22749   | 11919    | 20057    | 30847   | 28848   |
| QUASIMODO2-I | 571    | 44515  | 164     | 11247   | 9821     | 9220     | 1013    | 14357   |
| GYPSY11      | 13     | 176    | 2       | 136     | 77       | 154      | 29      | 264     |
| MARINER2     | 2      | 49     | 0       | 22      | 31       | 32       | 10      | 33      |
| DOC2         | 2010   | 28340  | 1331    | 16483   | 22688    | 18080    | 2431    | 23040   |
| COPIA2LTR    | 335    | 609    | 142     | 711     | 558      | 1219     | 1954    | 1814    |
| S            | 2943   | 9717   | 1068    | 5354    | 3091     | 4870     | 848     | 8944    |
| STALKER4     | 60984  | 309121 | 34776   | 363296  | 143910   | 417014   | 87495   | 322716  |
| PEN1         | 0      | 0      | 0       | 0       | 1        | 0        | 0       | 0       |
| DIVER2       | 319    | 8386   | 198     | 7468    | 6320     | 5635     | 1207    | 12167   |
| SAR          | 204    | 96     | 73      | 225     | 79       | 316      | 187     | 141     |
| TC1-2        | 118    | 4768   | 42      | 4418    | 3036     | 3642     | 151     | 2597    |
| ACCORD2      | 487    | 29104  | 192     | 20781   | 18556    | 23209    | 1153    | 33485   |
| FROGGER      | 5      | 204    | 2       | 116     | 106      | 137      | 18      | 198     |
| INVADER6     | 2659   | 65074  | 884     | 45323   | 24189    | 49730    | 2238    | 52300   |
| MDG3         | 10989  | 41569  | 8276    | 19762   | 41292    | 60944    | 1387    | 20294   |
| DNAREP1      | 55     | 3756   | 19      | 2361    | 1413     | 2200     | 169     | 2211    |
| ROO          | 77745  | 412727 | 43983   | 405566  | 312266   | 480554   | 96228   | 317238  |
| Transib5     | 97     | 2795   | 43      | 2269    | 3349     | 3780     | 380     | 3942    |
| DMRPR        | 0      | 0      | 0       | 0       | 0        | 0        | 0       | 0       |
| INVADER4     | 576    | 9983   | 1112    | 9543    | 10593    | 9650     | 778     | 9301    |
| DMRT1C       | 22     | 1524   | 7       | 709     | 777      | 913      | 49      | 1888    |
| MDG1         | 7031   | 155867 | 4158    | 162877  | 29219    | 118023   | 18868   | 286447  |
| Transib1     | 46     | 3039   | 17      | 1579    | 783      | 1547     | 67      | 2085    |
| HELENA_RT    | 26     | 740    | 9       | 1052    | 672      | 954      | 178     | 1140    |
| RSP          | 2874   | 695    | 76      | 96      | 265      | 274      | 552     | 650     |
| LOOPER1      | 69     | 4492   | 23      | 2781    | 1472     | 2574     | 189     | 2943    |
| S2           | 7      | 92     | 2       | 86      | 64       | 94       | 19      | 161     |
| DIVER        | 541    | 34067  | 734     | 23497   | 17485    | 11185    | 1039    | 24270   |
| LINEJ1       | 1413   | 61586  | 606     | 37437   | 36915    | 42340    | 2625    | 47357   |
| ALA          | 0      | 0      | 0       | 0       | 0        | 0        | 0       | 0       |
| FW3          | 26     | 389    | 22      | 375     | 341      | 390      | 81      | 586     |
| DOC3         | 4336   | 40993  | 2663    | 30692   | 35865    | 36331    | 5447    | 34662   |
| DM412        | 8321   | 270760 | 3328    | 337464  | 39605    | 187076   | 18113   | 469794  |
| INVADER1     | 4015   | 21972  | 4586    | 36423   | 31300    | 50284    | 7957    | 22514   |
| INVADER5     | 4      | 48     | 2       | 33      | 63       | 52       | 5       | 40      |
| TLD1         | 0      | 11     | 0       | 27      | 19       | 19       | 0       | 25      |
| G7           | 3      | 51     | 1       | 43      | 43       | 38       | 4       | 33      |
| PEN4         | 0      | 0      | 0       | 0       | 0        | 0        | 0       | 0       |
| Transib4     | 5      | 65     | 2       | 40      | 25       | 43       | 7       | 78      |
| GYPSY2       | 478    | 30560  | 189     | 20703   | 18139    | 24554    | 1639    | 37980   |
| JOCKEY2      | 592    | 2568   | 821     | 3243    | 1251     | 2585     | 556     | 4014    |
| DM1731       | 1342   | 24641  | 4106    | 31713   | 30464    | 37698    | 1123    | 24255   |
| XDMR         | 27     | 218    | 6       | 143     | 51       | 86       | 46      | 75      |
| ZAM          | 453    | 10528  | 124     | 9261    | 747      | 5798     | 821     | 16933   |
| TC1          | 8      | 388    | 3       | 393     | 162      | 251      | 17      | 447     |

|                       |        |        |        |        |        |        |        |        |
|-----------------------|--------|--------|--------|--------|--------|--------|--------|--------|
| <b>M4DM</b>           | 1007   | 1344   | 557    | 2107   | 1899   | 2887   | 1223   | 2729   |
| <b>QUASIMODO2-LTR</b> | 189    | 3476   | 139    | 2191   | 2000   | 2519   | 228    | 2899   |
| <b>DM297</b>          | 38812  | 213721 | 7138   | 288019 | 162021 | 380655 | 34943  | 333093 |
| <b>BURDOCK</b>        | 728    | 46273  | 296    | 26774  | 26904  | 30477  | 2974   | 40870  |
| <b>BS</b>             | 1345   | 53920  | 359    | 41004  | 34089  | 50471  | 2041   | 44540  |
| <b>COPIA</b>          | 9499   | 15762  | 20532  | 44219  | 28185  | 60125  | 7054   | 36067  |
| <b>PROTOP_B</b>       | 15078  | 16023  | 6992   | 14876  | 8962   | 13893  | 22175  | 18416  |
| <b>TAHRE</b>          | 1879   | 61358  | 746    | 36881  | 30077  | 47691  | 6976   | 62452  |
| <b>DOC6</b>           | 1670   | 31487  | 1016   | 22146  | 8515   | 14824  | 1250   | 19501  |
| <b>G5</b>             | 109    | 5041   | 74     | 5214   | 10160  | 7148   | 286    | 7928   |
| <b>FW</b>             | 180343 | 332458 | 127402 | 308490 | 204087 | 235846 | 149840 | 302042 |
| <b>DMRT1A</b>         | 3465   | 165599 | 1379   | 131193 | 135617 | 157803 | 13404  | 143919 |
| <b>TLD2</b>           | 11     | 704    | 1      | 470    | 134    | 326    | 39     | 737    |
| <b>DOC4</b>           | 16     | 732    | 2      | 377    | 451    | 448    | 81     | 967    |
| <b>DOC5</b>           | 86     | 4029   | 39     | 3881   | 3513   | 3159   | 272    | 5446   |
| <b>ROVER</b>          | 1143   | 38223  | 1270   | 57502  | 11307  | 28729  | 4184   | 97115  |
| <b>DMCR1A</b>         | 33215  | 74290  | 20850  | 78918  | 59635  | 80445  | 41028  | 83065  |
| <b>TABOR</b>          | 3126   | 142029 | 915    | 66046  | 5252   | 125609 | 7686   | 94074  |
| <b>MICROPIA</b>       | 6724   | 24440  | 6376   | 29067  | 40087  | 63692  | 3268   | 22360  |
| <b>ROOA</b>           | 1305   | 75828  | 493    | 53944  | 38370  | 65337  | 2568   | 46756  |
| <b>DMHMR2</b>         | 623    | 12227  | 152    | 5104   | 4653   | 6486   | 1860   | 8670   |
| <b>R1-2</b>           | 7      | 215    | 4      | 155    | 187    | 160    | 16     | 179    |
| <b>GYPSY8</b>         | 221    | 19327  | 49     | 5606   | 6444   | 6342   | 282    | 10472  |
| <b>ARS406</b>         | 1785   | 670    | 1139   | 441    | 343    | 1736   | 893    | 755    |
| <b>IVK</b>            | 1101   | 38364  | 761    | 24938  | 27568  | 30862  | 1761   | 25968  |
| <b>MAX</b>            | 72102  | 286753 | 16063  | 212047 | 195127 | 233856 | 49357  | 206279 |
| <b>BS2</b>            | 2389   | 101346 | 807    | 82456  | 79428  | 100581 | 6285   | 87017  |
| <b>PROTOP</b>         | 43793  | 61404  | 20580  | 52411  | 44750  | 82868  | 39255  | 58297  |
| <b>BLOOD</b>          | 2604   | 111437 | 3298   | 97950  | 241547 | 162272 | 5883   | 119228 |
| <b>FB4</b>            | 546    | 490    | 169    | 420    | 383    | 1891   | 1463   | 1724   |
| <b>G4</b>             | 181    | 9798   | 81     | 8670   | 5024   | 7596   | 621    | 8628   |
| <b>I</b>              | 635    | 40335  | 596    | 25739  | 23111  | 20342  | 1933   | 34365  |
| <b>BARI</b>           | 25306  | 18046  | 8467   | 16634  | 16929  | 10421  | 7619   | 26591  |
| <b>DMHMR1</b>         | 14     | 222    | 10     | 193    | 242    | 160    | 145    | 567    |
| <b>COPIA2I</b>        | 6254   | 15085  | 2494   | 11491  | 12077  | 10348  | 5660   | 12619  |
| <b>FUSHI</b>          | 0      | 0      | 0      | 0      | 0      | 0      | 0      | 0      |
| <b>ALUII</b>          | 3      | 4      | 3      | 5      | 4      | 5      | 5      | 6      |
| <b>BAGGINS1</b>       | 5790   | 55230  | 5015   | 33337  | 36033  | 38331  | 8808   | 39345  |
| <b>QUASIMODO</b>      | 1654   | 29995  | 5531   | 55306  | 52596  | 95512  | 6745   | 49666  |
| <b>G5A</b>            | 21     | 925    | 5      | 676    | 704    | 772    | 51     | 1084   |
| <b>POGON1</b>         | 75     | 309    | 50     | 373    | 199    | 312    | 65     | 460    |
| <b>Transib-N1</b>     | 0      | 2      | 0      | 5      | 3      | 4      | 0      | 3      |
| <b>G2</b>             | 2930   | 42007  | 3063   | 50130  | 31785  | 33079  | 5972   | 50000  |
| <b>DMRP1</b>          | 0      | 0      | 0      | 1      | 0      | 0      | 0      | 2      |
| <b>IDEFIX</b>         | 645    | 22790  | 1098   | 20493  | 23656  | 28790  | 2355   | 29259  |
| <b>R2</b>             | 350    | 29321  | 129    | 9711   | 9577   | 8746   | 628    | 15087  |
| <b>TRANSPAC</b>       | 281    | 22259  | 109    | 10662  | 7192   | 8320   | 882    | 12035  |
| <b>BLASTOPIA</b>      | 3307   | 46589  | 5737   | 48428  | 74833  | 104142 | 1454   | 29453  |
| <b>DM176</b>          | 22632  | 71658  | 18910  | 95940  | 66147  | 61209  | 13913  | 113089 |
| <b>GYPSY3</b>         | 323    | 23268  | 153    | 13268  | 11213  | 22802  | 1372   | 18623  |
| <b>TRANSIB2</b>       | 3545   | 18219  | 1314   | 12845  | 16653  | 20695  | 1178   | 13107  |
| <b>NTS</b>            | 6222   | 22425  | 2599   | 3855   | 2763   | 5786   | 3266   | 7179   |
| <b>GYPSY9</b>         | 3      | 308    | 3      | 245    | 216    | 212    | 16     | 234    |
| <b>GYPSY12</b>        | 1742   | 41350  | 2161   | 39436  | 27541  | 52156  | 4632   | 49803  |
| <b>DOC</b>            | 219113 | 390869 | 75007  | 190911 | 208756 | 260108 | 129523 | 193104 |
| <b>G6</b>             | 1144   | 35443  | 714    | 20462  | 74708  | 85817  | 1174   | 22809  |
| <b>GYPSY7</b>         | 58     | 3849   | 18     | 1806   | 1615   | 1858   | 98     | 1611   |
| <b>TART_B1</b>        | 1196   | 70136  | 2064   | 45495  | 184495 | 231569 | 5617   | 84953  |
| <b>GYPSY</b>          | 826    | 46772  | 368    | 22393  | 18658  | 19784  | 2323   | 34844  |
| <b>NOMAD</b>          | 41353  | 309011 | 2538   | 89759  | 155151 | 156313 | 16040  | 89768  |
| <b>R1</b>             | 51022  | 286739 | 40397  | 116622 | 166842 | 180826 | 48810  | 189292 |
| <b>BS4</b>            | 0      | 19     | 1      | 9      | 17     | 21     | 0      | 10     |
| <b>HETA</b>           | 4778   | 94328  | 1307   | 70882  | 26633  | 53380  | 15765  | 79338  |
| <b>G</b>              | 975    | 64037  | 2488   | 45424  | 47731  | 39336  | 12943  | 79748  |
| <b>FW2</b>            | 14     | 448    | 12     | 385    | 485    | 517    | 70     | 467    |
| <b>POGO</b>           | 7125   | 13818  | 3630   | 16938  | 8288   | 12200  | 1367   | 12117  |
| <b>STALKER2</b>       | 14139  | 66003  | 7194   | 75972  | 35137  | 88825  | 20186  | 92249  |

|                    |      |        |       |        |        |        |       |        |
|--------------------|------|--------|-------|--------|--------|--------|-------|--------|
| <b>BEL</b>         | 983  | 49215  | 3024  | 35552  | 53716  | 42046  | 2220  | 34789  |
| <b>PLACW</b>       | 1    | 4      | 0     | 5      | 5      | 7      | 3     | 12     |
| <b>GYPSY6</b>      | 1290 | 40096  | 543   | 26140  | 20379  | 20652  | 3901  | 41936  |
| <b>HOBO</b>        | 121  | 1748   | 77    | 2245   | 4393   | 5535   | 366   | 2070   |
| <b>INVADER2</b>    | 8534 | 42497  | 11419 | 31943  | 22462  | 21460  | 2741  | 34058  |
| <b>CIRCE</b>       | 2844 | 24163  | 4740  | 36527  | 29734  | 63183  | 11952 | 38875  |
| <b>DMRT1B</b>      | 5150 | 271702 | 2493  | 188024 | 168162 | 193999 | 20495 | 199542 |
| <b>GYPSY5</b>      | 974  | 63388  | 97    | 37495  | 1316   | 55096  | 3512  | 62182  |
| <b>G3</b>          | 4    | 457    | 4     | 298    | 348    | 450    | 50    | 421    |
| <b>TRANSIB3</b>    | 3    | 160    | 1     | 242    | 60     | 92     | 12    | 440    |
| <b>GYPSY10</b>     | 190  | 11350  | 25    | 8966   | 1676   | 8190   | 592   | 14464  |
| <b>DMLTR5</b>      | 192  | 1693   | 202   | 3700   | 3978   | 8193   | 129   | 2039   |
| <b>FTZ</b>         | 0    | 0      | 0     | 0      | 0      | 0      | 0     | 0      |
| <b>HMSBEAGLE_I</b> | 6455 | 36692  | 14892 | 57164  | 96395  | 125998 | 2642  | 33230  |
| <b>GYPSY4</b>      | 2501 | 59095  | 2335  | 57480  | 33732  | 36478  | 4628  | 68495  |
| <b>HELITRON1</b>   | 0    | 4      | 0     | 5      | 7      | 12     | 1     | 10     |
| <b>BS3</b>         | 51   | 3221   | 32    | 1992   | 3190   | 3304   | 99    | 2846   |
| <b>TIRANT</b>      | 8    | 1125   | 1     | 106    | 65     | 79     | 441   | 133    |

**Supplementary Table 2B**

all heterozygote libraries were scaled to 1 million repeat derived 23-30mer small RNAs

each mutant library was normalized to its respective het library via non-TE derived endogenous siRNAs (see Malone et al. 2009)

the spn-E data was taken from Malone et al. 2009

elements colored in red are germline dominant, in yellow are intermediate and in green are soma dominant (according to Malone et al. 2009)

| #TP       | ZucMut | ZucHet | zuc_log2_ratio | ArmiMut | ArmiHet | armi_log2_ratio | Fs1YbMut | Fs1YbHet | yb_log2_ratio | VretMut | VretHet | vret-log2_ratio | spnE-log2_ratio |
|-----------|--------|--------|----------------|---------|---------|-----------------|----------|----------|---------------|---------|---------|-----------------|-----------------|
| PROTOP_A  | 680    | 1413   | 1.054244095    | 927     | 1593    | 0.781545759     | 715      | 1232     | 0.78488102    | 1254    | 1712    | 0.449316679     | 4.10            |
| HETA      | 138    | 5816   | 5.394133133    | 112     | 4962    | 5.472530049     | 1598     | 3279     | 1.037122746   | 641     | 4707    | 2.877262425     | 6.75            |
| NOMAD     | 1197   | 19052  | 3.992520108    | 217     | 6284    | 4.855734413     | 9309     | 9603     | 0.044803158   | 652     | 5326    | 3.030502676     | 5.01            |
| DOC       | 6342   | 24099  | 1.925935899    | 6414    | 13365   | 1.059244869     | 12525    | 15979    | 0.351331495   | 5263    | 11457   | 1.122145307     | 4.23            |
| DMRT1B    | 149    | 16752  | 6.812234755    | 213     | 13163   | 5.948331915     | 10090    | 11918    | 0.240235869   | 833     | 11839   | 3.82932411      | 6.33            |
| TAHRE     | 54     | 3783   | 6.120140299    | 64      | 2582    | 5.339000117     | 1805     | 2930     | 0.699094746   | 283     | 3705    | 3.708251394     | 6.38            |
| G6_DM     | 33     | 2185   | 6.044267578    | 61      | 1433    | 4.552321063     | 4482     | 5272     | 0.234039114   | 48      | 1353    | 4.826074449     | 4.16            |
| R1_DM     | 1477   | 17679  | 3.581472597    | 3454    | 8165    | 1.24096169      | 10010    | 11108    | 0.150158005   | 1983    | 11231   | 2.501340348     | 4.86            |
| FW_DM     | 5220   | 20498  | 1.97335448     | 10894   | 21597   | 0.987277582     | 12245    | 14488    | 0.242699231   | 6089    | 17920   | 1.557301936     | 4.00            |
| TART      | 74     | 7156   | 6.590218677    | 223     | 6413    | 4.845757857     | 6744     | 8736     | 0.373326733   | 352     | 5689    | 4.013298079     | 4.97            |
| I_DM      | 18     | 2487   | 7.080057666    | 51      | 1802    | 5.143941647     | 1387     | 1250     | -0.150079769  | 79      | 2039    | 4.698001982     | 0.93            |
| BATUMI    | 1261   | 6684   | 2.405532672    | 1879    | 7592    | 2.014865062     | 6341     | 9893     | 0.641727789   | 2432    | 7625    | 1.648378224     | 6.16            |
| MAX       | 2087   | 17680  | 3.082623209    | 1374    | 14845   | 3.434012588     | 11707    | 14366    | 0.295245411   | 2006    | 12238   | 2.609245909     | 6.24            |
| BEL       | 28     | 3034   | 6.73668868     | 259     | 2489    | 3.266842461     | 3223     | 2583     | -0.319344933  | 90      | 2064    | 4.515975193     | 6.07            |
| DM1731    | 39     | 1519   | 5.289530042    | 351     | 2220    | 2.660710612     | 1828     | 2316     | 0.341420989   | 46      | 1439    | 4.978827912     | 5.53            |
| BS2       | 69     | 6249   | 6.497664297    | 69      | 5773    | 6.386353777     | 4766     | 6179     | 0.374676607   | 255     | 5163    | 4.337288195     | 6.58            |
| DM297     | 1123   | 13177  | 3.552079802    | 610     | 20164   | 5.045942059     | 9721     | 23384    | 1.266341598   | 1420    | 19762   | 3.798825221     | 3.14            |
| INVADER4  | 17     | 616    | 5.206258522    | 95      | 668     | 2.812727868     | 636      | 593      | -0.100471993  | 32      | 552     | 4.125519341     | 4.39            |
| ROO       | 2250   | 25447  | 3.499291833    | 3761    | 28393   | 2.916360579     | 18736    | 29521    | 0.655961448   | 3910    | 18821   | 2.267012509     | 4.07            |
| DM176     | 655    | 4418   | 2.753689509    | 1617    | 6717    | 2.05442486      | 3969     | 3760     | -0.077893542  | 565     | 6709    | 3.568928732     | 2.18            |
| QUASIMODO | 48     | 1849   | 5.271616704    | 473     | 3872    | 3.03326554      | 3156     | 5867     | 0.894767305   | 274     | 2947    | 3.426343777     | 1.05            |
| GYPSY3    | 9      | 1435   | 7.261595047    | 13      | 929     | 6.149717238     | 673      | 1401     | 1.05802644    | 56      | 1105    | 4.308708676     | 1.02            |
| GYPSY4    | 72     | 3644   | 5.65338492     | 200     | 4024    | 4.333007391     | 2024     | 2241     | 0.146947159   | 188     | 4064    | 4.433513474     | 1.43            |
| BLOOD     | 75     | 6871   | 6.510280878    | 282     | 6857    | 4.603823972     | 14493    | 9969     | -0.539851464  | 239     | 7074    | 4.887002803     | 0.54            |
| STALKER4  | 1765   | 19059  | 3.432594793    | 2974    | 25434   | 3.096423359     | 8634     | 25618    | 1.56896736    | 3555    | 19146   | 2.428968192     | 1.29            |
| IDEFIX    | 19     | 1405   | 6.233883766    | 94      | 1435    | 3.933623022     | 1419     | 1769     | 0.317400027   | 96      | 1736    | 4.181057063     | 0.04            |
| ROVER_DM  | 33     | 2357   | 6.154469519    | 109     | 4026    | 5.212153518     | 678      | 1765     | 1.379329962   | 170     | 5762    | 5.082714954     | 0.36            |
| GYPSY     | 24     | 2884   | 6.914285341    | 31      | 1568    | 5.638640027     | 1119     | 1215     | 0.118578183   | 94      | 2067    | 4.452824757     | 0.19            |
| STALKER2  | 409    | 4069   | 3.313777325    | 615     | 5319    | 3.112043521     | 2108     | 5457     | 1.372013151   | 820     | 5473    | 2.738153779     | 0.92            |
| DM412     | 241    | 16694  | 6.115039705    | 285     | 23625   | 6.375376147     | 2376     | 11492    | 2.273908391   | 736     | 27872   | 5.242906433     | 0.31            |
| GYPSY2    | 14     | 1884   | 7.089415927    | 16      | 1449    | 6.486751578     | 1088     | 1508     | 0.470901532   | 67      | 2253    | 5.080327711     | 0.58            |
| MDG1      | 204    | 9610   | 5.561367622    | 356     | 11403   | 5.003191109     | 1753     | 7250     | 2.048127713   | 767     | 16995   | 4.470230382     | 0.31            |
| GTWIN     | 46     | 4669   | 6.667245243    | 12      | 6456    | 9.116802276     | 285      | 1196     | 2.070195793   | 189     | 10008   | 5.72482243      | -0.06           |
| GYPSY10   | 5      | 700    | 6.991474881    | 2       | 628     | 8.197834378     | 101      | 503      | 2.322879689   | 24      | 858     | 5.156701162     | -0.01           |
| TABOR     | 90     | 8757   | 6.596649758    | 78      | 4624    | 5.884997419     | 315      | 7716     | 4.613967498   | 312     | 5581    | 4.159466732     | -0.03           |
| ZAM       | 13     | 649    | 5.629502346    | 11      | 648     | 5.934197742     | 45       | 356      | 2.990413572   | 33      | 1005    | 4.912287129     | -0.33           |
| GYPSY5    | 28     | 3908   | 7.115069979    | 8       | 2625    | 8.305939545     | 79       | 3385     | 5.421754574   | 143     | 3689    | 4.692107835     | -0.64           |

### Supplementary Table 3

Identified Proteins that were more than 10fold enriched (quantitative mass-spec analysis) in Vreteno-GFP immuno-precipitates compared to a control sample (wildtype ovaries). Ribosomal proteins were excluded.

| <b>protein ID</b> | <b>gene name</b> | <b>peptide coverage [%]</b> | <b># unique peptides</b> | <b># of peptides</b> | <b>iTRAQ enrichment</b> |
|-------------------|------------------|-----------------------------|--------------------------|----------------------|-------------------------|
| FBpp0076182       | Hsp27            | 26.3                        | 2                        | 5                    | 16x                     |
| FBpp0083716       | CG4771           | 54.9                        | 30                       | 37                   | 13x                     |
| FBpp0073872       | CG9281           | 5.4                         | 3                        | 3                    | 12x                     |
| FBpp0079562       | CG31755          | 33.0                        | 35                       | 42                   | 10x                     |
| FBpp0078210       | CG11133          | 35.0                        | 26                       | 34                   | 10x                     |



#### Supplementary Table 4

VDRC lines used in this study

|          |          |
|----------|----------|
| Tudor-SN | 19011GD  |
| yu       | 48006GD  |
| CG13472  | 32193GD  |
| tej      | 24181GD  |
| CG8920   | 28998GD  |
| CG4771   | 34897GD  |
| CG9925   | 29329GD  |
| CG9684   | 24090GD  |
| CG7082   | 2553GD   |
| spn-E    | 21374GD  |
| CG11133  | 18149GD  |
| tud      | 24031GD  |
| CG31755  | 100190KK |
| CG14303  | 17474GD  |
| fs(1)Yb  | 25437GD  |
| armi     | 16205GD  |
| zuc      | 48764GD  |

## Supplementary Table 5

Primers for shRNA construct cloning

|                 |                                                                              |
|-----------------|------------------------------------------------------------------------------|
| CG9925_top      | ctagcagtAAAGTGTATGTTCAAACATTatagttatattcaagcataTAATGTTT<br>GAACATACACTTTgcg  |
| CG9925_bottom   | aattcgcAAAGTGTATGTTCAAACATTatgcttgaatataactaTAATGTTTG<br>AACATACACTTTactg    |
| CG31755_top     | ctagcagtAAGGTTCAAAGTATCAGCGAAtagttatattcaagcataTTCGCTGA<br>TACTTTGAACCTTgcg  |
| CG31755_bottom  | aattcgcAAGGTTCAAAGTATCAGCGAAtatgcttgaatataactaTTCGCTGAT<br>ACTTTGAACCTTactg  |
| CG9684_top      | ctagcagtAAGGATATCAATGATGAGTTatagttatattcaagcataTAACTCAT<br>CATTGATATCCTTgcg  |
| CG9684_bottom   | aattcgcAAGGATATCAATGATGAGTTatgcttgaatataactaTAACTCATC<br>ATTGATATCCTTactg    |
| yu_top          | ctagcagtCAGCAAGTCGATGAACATCAAtagttatattcaagcataTTGATGTT<br>CATCGACTTGCTGgcg  |
| yu_bottom       | aattcgcCAGCAAGTCGATGAACATCAAtatgcttgaatataactaTTGATGTTT<br>ATCGACTTGCTGactg  |
| CG13472_top     | ctagcagtCTGCAGCGAAATCGACAAATatagttatattcaagcataTATTTGTC<br>GATTTTCGCTGCAGgcg |
| CG13472_bottom  | aattcgcCTGCAGCGAAATCGACAAATatgcttgaatataactaTATTTGTCG<br>ATTTTCGCTGCAGactg   |
| Tudor-SN_top    | ctagcagtTAGAAGAAGTGCCTAAAGAAAtagttatattcaagcataTTTCTTTA<br>GGCACTTCTTCTAgcg  |
| Tudor-SN_bottom | aattcgcTAGAAGAAGTGCCTAAAGAAAtatgcttgaatataactaTTTCTTTAG<br>GCACTTCTTCTAactg  |
| CG8920_top      | ctagcagtCAGCATGTATGCGTTGGATAAtagttatattcaagcataTTATCCAA<br>CGCATACATGCTGgcg  |
| CG8920_bottom   | aattcgcCAGCATGTATGCGTTGGATAAtatgcttgaatataactaTTATCCAAC<br>GCATACATGCTGactg  |
| CG7082_top      | ctagcagtCACCCACAACAAGTTAATCAAtagttatattcaagcataTTGATTAA<br>CTTGTGTGGGTGgcg   |
| CG7082_bottom   | aattcgcCACCCACAACAAGTTAATCAAtatgcttgaatataactaTTGATTAAAC<br>TTGTGTGGGTGactg  |
| tud_top         | ctagcagtCAGATTGACTACTAAAGATAAtagttatattcaagcataTTATCTTT<br>AGTAGCAATCTGgcg   |
| tud_bottom      | aattcgcCAGATTGACTACTAAAGATAAtatgcttgaatataactaTTATCTTTA<br>GTAGTCAATCTGactg  |
| CG4771_top      | ctagcagtCAGCTGGAAGACTGTATGAAAtagttatattcaagcataTTCATACA<br>GTCTTTCCAGCTGgcg  |
| CG4771_bottom   | aattcgcCAGCTGGAAGACTGTATGAAAtatgcttgaatataactaTTCATACAG<br>TCTTTCCAGCTGactg  |
| CG11133_bottom  | aattcgcCAGCTGGAAGATGAAAGTAAAtatgcttgaatataactaTTTACTTTC<br>ATCTTCCAGCTGactg  |
| CG11133_top     | ctagcagtCAGCTGGAAGATGAAAGTAAAtagttatattcaagcataTTTACTTT<br>CATCTTCCAGCTGgcg  |
| CG8589_top      | ctagcagtCTCCAAGTCATTGAAAGTAAAtagttatattcaagcataTAACTTT<br>CAATGACTTGGAGgcg   |

|                |                                                                              |
|----------------|------------------------------------------------------------------------------|
| CG8589_bottom  | aattcgcCTCCAAGTCATTGAAAGTTAAatagcttgaatataactaTTAACTTTC<br>AATGACTTGGAGactg  |
| CG14303_top    | ctagcagtCCGGAGGATTTCTATGTTCAAatagttatattcaagcataTTGAACAT<br>AGAAATCCTCCGGgcg |
| CG14303_bottom | aattcgcCCGGAGGATTTCTATGTTCAAatagcttgaatataactaTTGAACATA<br>GAAATCCTCCGGactg  |
| spn-E_top      | ctagcagtCTCGAAGAAGCTATTATTATAtagttatattcaagcataTATAATAA<br>TAGCTTCTTCGAGgcg  |
| spn-E_bottom   | aattcgcCTCGAAGAAGCTATTATTATAtagcttgaatataactaTATAATAAT<br>AGCTTCTTCGAGactg   |
| krimp_top      | ctagcagtCAGATTGGGAGACTACGAATatagttatattcaagcataTATTCGTA<br>GTCTCCCAATCTGgcg  |
| krimp_bottom   | aattcgcCAGATTGGGAGACTACGAATatagcttgaatataactaTATTCGTAG<br>TCTCCCAATCTGactg   |
| fs(1)yb_top    | ctagcagtCAGCTGCGATAAGATCTTCAAatagttatattcaagcataTTGAAGAT<br>CTTATCGCAGCTGgcg |
| fs(1)yb_bottom | aattcgcCAGCTGCGATAAGATCTTCAAatagcttgaatataactaTTGAAGATC<br>TTATCGCAGCTGactg  |

### Supplementary Table 6

QPCR primers used in this study:

|             |                          |
|-------------|--------------------------|
| rp49_for    | CCGCTTCAAGGGACAGTATCTG   |
| rp49_rev    | ATCTCGCCGCAGTAAACGC      |
| HeT-A_for   | CGCGCGGAACCCATCTTCAGA    |
| HeT-A_rev   | CGCCGCAGTCGTTTGGTGAGT    |
| blood_for   | AACAATAGAAAGAAGCCACCGAAC |
| blood_rev   | AGTCATGGACTATTGAGGGTGTTG |
| ZAM_for     | ACTTGACCTGGATACACTCACAAC |
| ZAM_rev     | GAGTATTACGGCGACTAGGGATAC |
| HP1c_for    | GTGCGAAGAGATCCAGAAGC     |
| HP1c_rev    | AGTCGAACTCGTCGCAGAAC     |
| CG6985_for  | ACCGCATTTGGAAATTAGCC     |
| CG6985_rev  | ATTCCGATTGGGTGAACTCC     |
| vret_for    | TGGCCAACAATGAACCTCTT     |
| vret_rev    | GACTTCCACTGAGCCAATGC     |
| CG31755_for | TTCAAACAACACTTGGCTTCC    |
| CG31755_rev | AAAAACCCATCCGAAAGAAGTG   |
| CG11133_for | CAGATTTTCCCACTGTATGAGTGT |
| CG11133_rev | AATGCAGTCTTCTCCTGAGTATGG |
